# Supplementary material for: Blautia genus associated with visceral fat accumulation in adults 20–76 years of age
Source: PubMed Central journal article supplement (PMC6778088; doi:10.1038/s41522-019-0101-x), 2019-10-04
Supplement: 41522_2019_101_MOESM1_ESM.pdf [file 41522_2019_101_MOESM1_ESM.pdf]

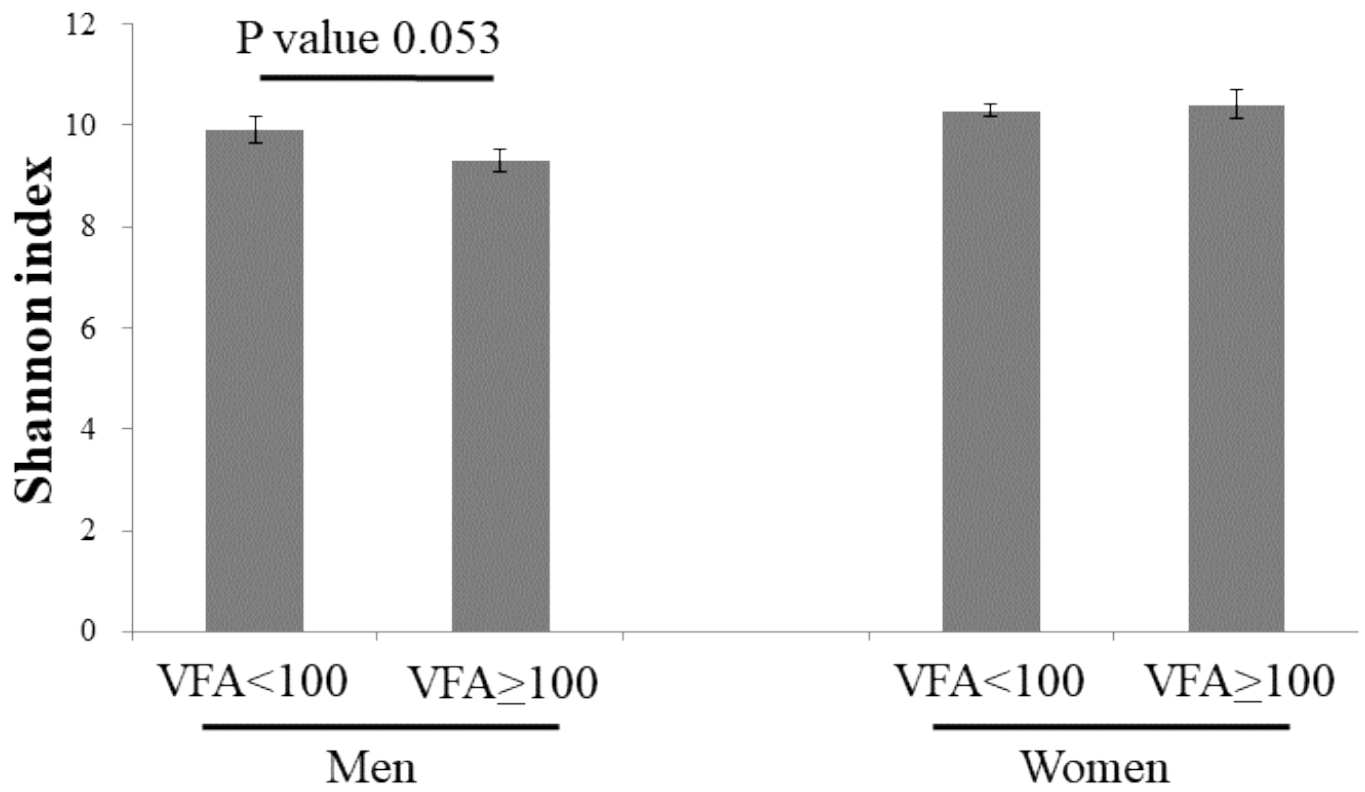

Supplementary Figure 1 The Shannon index of the gut microbiota stratified by VFA in each sex

The data are presented as mean ± standard error. The P-value was calculated using the Wilcoxon rank-sum test.

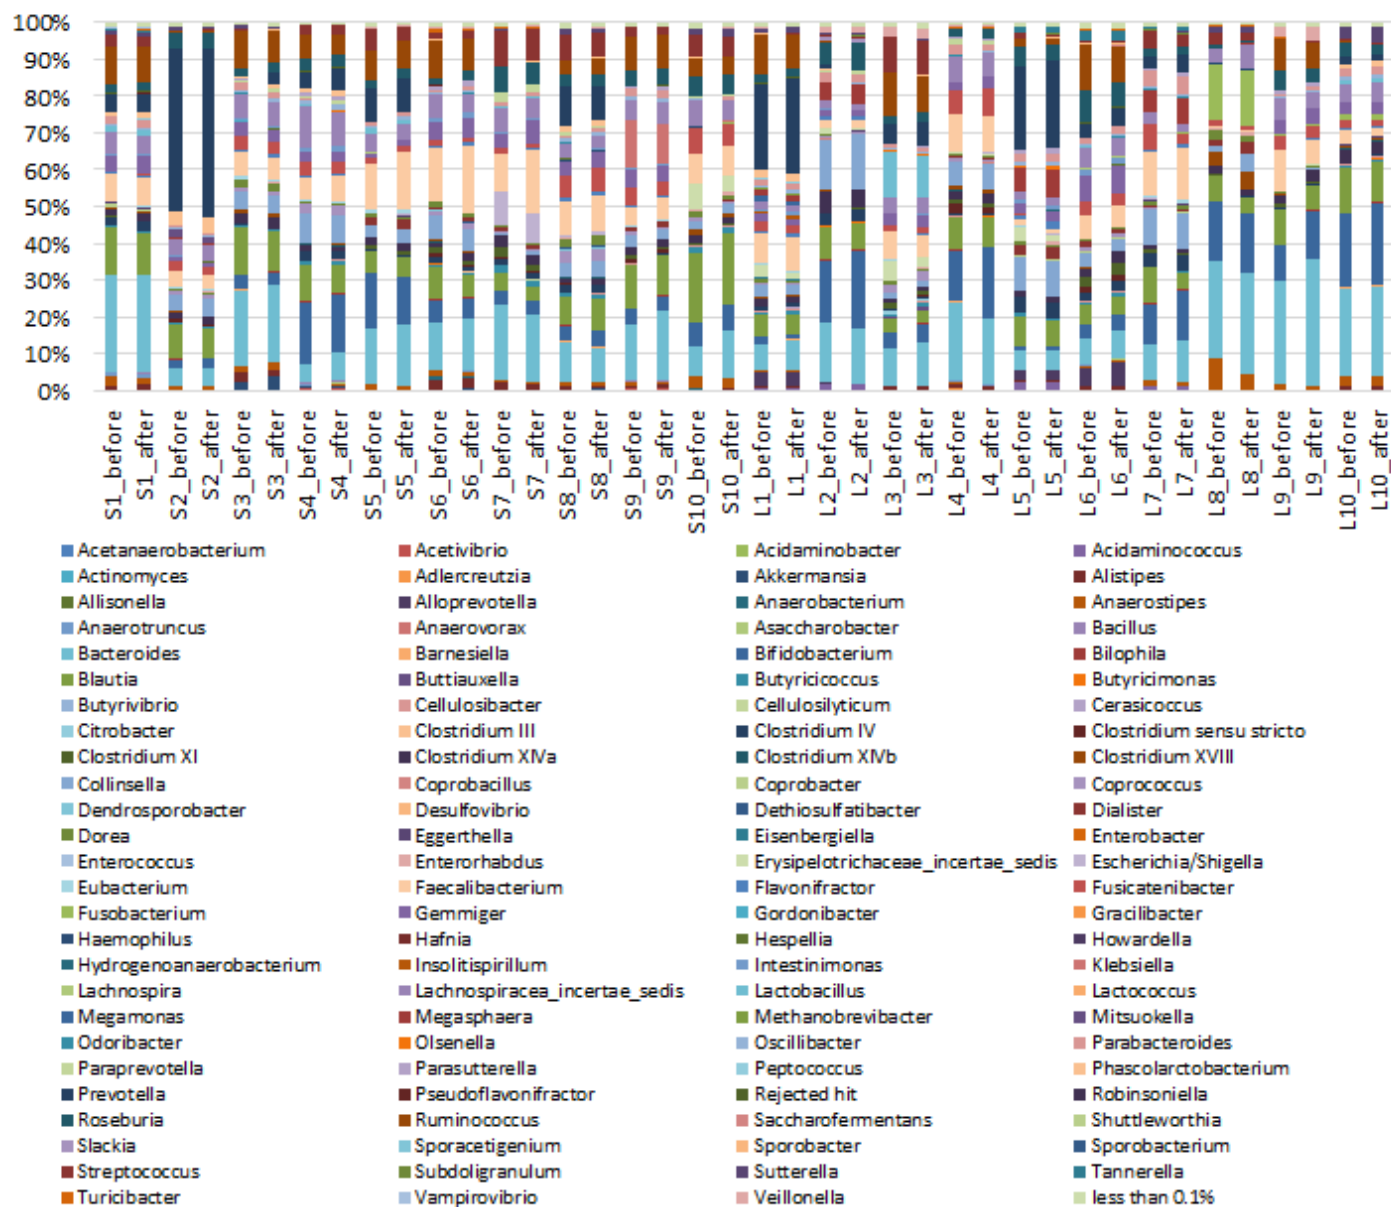

| Group 1 | Correlation coefficient | Group 2 | Correlation coefficient |
|---------|-------------------------|---------|-------------------------|
| S1      | 0.997                   | L1      | 0.990                   |
| S2      | 0.999                   | L2      | 0.984                   |
| S3      | 0.986                   | L3      | 0.980                   |
| S4      | 0.984                   | L4      | 0.972                   |
| S5      | 0.983                   | L5      | 0.992                   |
| S6      | 0.979                   | L6      | 0.978                   |
| S7      | 0.958                   | L7      | 0.953                   |
| S8      | 0.989                   | L8      | 0.979                   |
| S9      | 0.986                   | L9      | 0.975                   |
| S10     | 0.972                   | L10     | 0.994                   |

Supplementary Figure 2 Preservation stability of gut microbiota after storing for 1 year at 4°C

Pearson's correlation coefficient was used to evaluate the stability of the samples before and after preservation for 1 year. Group 1 and Group 2 were evaluated at different times. Gut microbiota with a relative abundance of less than 0.1% is described as < 0.1%.

Supplementary Table 1. Characteristics of the subjects in the main study group stratified by sex and VFA

| Characteristics                                    | Men     |          |         |          | P value  | Women   |          |         |          | P value  |
|----------------------------------------------------|---------|----------|---------|----------|----------|---------|----------|---------|----------|----------|
|                                                    | VFA<100 |          | 100≤VFA |          |          | VFA<100 |          | 100≤VFA |          |          |
| Visceral fat area (cm <sup>2</sup> )               | 69.5    | ± 22.8   | 140.2   | ± 31.4   |          | 57.5    | ± 22.2   | 124.9   | ± 23.4   |          |
| Number                                             | 183     |          | 208     |          |          | 513     |          | 97      |          |          |
| Age (y) <sup>+1</sup>                              | 49.1    | ± 14.8   | 53.1    | ± 13.3   | 0.009**  | 53.2    | ± 13.8   | 59.4    | ± 12.0   | <0.001** |
| Height (cm) <sup>+1</sup>                          | 169.2   | ± 6.8    | 169.0   | ± 6.5    | 0.966    | 155.9   | ± 6.0    | 154.2   | ± 6.6    | 0.015*   |
| Body weight (kg) <sup>+1</sup>                     | 62.2    | ± 7.0    | 72.9    | ± 10.8   | <0.001** | 52.0    | ± 6.8    | 65.1    | ± 9.1    | <0.001** |
| Body mass index (kg/m <sup>2</sup> ) <sup>+1</sup> | 21.7    | ± 2.0    | 25.5    | ± 3.0    | <0.001** | 21.4    | ± 2.7    | 27.4    | ± 3.5    | <0.001** |
| Waist circumference (cm) <sup>+1</sup>             | 76.8    | ± 5.3    | 88.3    | ± 7.3    | <0.001** | 71.6    | ± 7.2    | 87.8    | ± 8.0    | <0.001** |
| Serum Glucose (mg/dL) <sup>+1</sup>                | 4.4     | ± 0.6    | 4.9     | ± 1.2    | <0.001** | 4.4     | ± 0.7    | 4.8     | ± 0.7    | <0.001** |
| HbA1c (%) <sup>+1</sup>                            | 5.6     | ± 0.4    | 5.9     | ± 0.8    | <0.001** | 5.7     | ± 0.4    | 6.0     | ± 0.6    | <0.001** |
| SBP (mmHg) <sup>+1</sup>                           | 122.5   | ± 17.0   | 127.7   | ± 15.3   | 0.001**  | 117.8   | ± 17.2   | 129.7   | ± 17.5   | <0.001** |
| DBP (mmHg) <sup>+1</sup>                           | 76.3    | ± 12.2   | 80.3    | ± 10.7   | <0.001** | 72.1    | ± 11.1   | 78.2    | ± 11.0   | <0.001** |
| Triglyceride (mg/dL) <sup>+1</sup>                 | 1.1     | ± 0.7    | 1.7     | ± 1.5    | <0.001** | 0.9     | ± 0.4    | 1.2     | ± 0.6    | <0.001** |
| Total cholesterol (mg/dL) <sup>+1</sup>            | 5.1     | ± 0.8    | 5.5     | ± 0.8    | <0.001** | 5.4     | ± 0.9    | 5.6     | ± 0.8    | 0.005**  |
| HDL cholesterol (mg/dL) <sup>+1</sup>              | 1.7     | ± 0.4    | 1.5     | ± 0.4    | <0.001** | 1.9     | ± 0.4    | 1.6     | ± 0.4    | <0.001** |
| LDL cholesterol (mg/dL) <sup>+1</sup>              | 109.6   | ± 27.2   | 123.1   | ± 26.8   | <0.001** | 116.4   | ± 29.4   | 129.0   | ± 26.9   | <0.001** |
| Smoking habit (stick/d) <sup>+1</sup>              | 11.0    | ± 11.4   | 12.5    | ± 12.0   | 0.240    | 2.3     | ± 5.4    | 2.4     | ± 5.6    | 0.741    |
| Sleep time (h/d) <sup>+1</sup>                     | 7.1     | ± 1.3    | 7.2     | ± 1.2    | 0.328    | 6.8     | ± 1.0    | 7.0     | ± 1.0    | 0.039*   |
| Walk speed (sec/10m) <sup>+1</sup>                 | 3.6     | ± 0.8    | 3.6     | ± 0.7    | 0.866    | 4.0     | ± 0.7    | 4.5     | ± 1.0    | 0.001**  |
| Habitual medicine use (% of Yes) <sup>+2</sup>     | 20.1%   |          | 36.7%   |          | <0.001** | 27.3%   |          | 47.4%   |          | <0.001** |
| Hypertension <sup>+2</sup>                         | 14.1%   |          | 32.4%   |          | <0.001** | 20.3%   |          | 38.1%   |          | <0.001** |
| Hyperlipidaemia <sup>+2</sup>                      | 4.9%    |          | 13.5%   |          | 0.006**  | 11.3%   |          | 18.6%   |          | 0.069    |
| Diabetes <sup>+2</sup>                             | 2.7%    |          | 7.7%    |          | 0.049*   | 1.8%    |          | 3.1%    |          | 0.637    |
| Rheumatism <sup>+2</sup>                           | 1.1%    |          | 0.5%    |          | 0.918    | 1.8%    |          | 4.1%    |          | 0.272    |
| Total energy intake (kcal/d) <sup>+1</sup>         | 8879.8  | ± 2597.8 | 8810.7  | ± 2266.7 | 0.782    | 6946.2  | ± 1920.5 | 7140.5  | ± 1802.1 | 0.402    |
| Carbohydrate intake <sup>+1</sup>                  | 0.60    | ± 0.08   | 0.59    | ± 0.07   | 0.119    | 0.57    | ± 0.07   | 0.58    | ± 0.07   | 0.042*   |
| Fat intake <sup>+1</sup>                           | 0.25    | ± 0.06   | 0.26    | ± 0.05   | 0.153    | 0.27    | ± 0.05   | 0.26    | ± 0.05   | 0.013*   |
| Protein intake <sup>+1</sup>                       | 0.15    | ± 0.03   | 0.15    | ± 0.03   | 0.100    | 0.16    | ± 0.03   | 0.16    | ± 0.03   | 0.426    |
| Alcohol consumption (g/d) <sup>+1</sup>            | 19.0    | ± 21.9   | 23.9    | ± 24.6   | 0.041*   | 4.5     | ± 10.7   | 3.3     | ± 8.9    | 0.056    |
| Total dietary fibre intake (g/d) <sup>+1</sup>     | 11.1    | ± 4.8    | 11.0    | ± 4.5    | 0.975    | 10.8    | ± 4.3    | 10.7    | ± 4.1    | 0.864    |

P<0.05 and <0.01 are indicated by \* and \*\*, respectively.

\*1 Wilcoxon rank-sum test was used

\*2 test for equality of proportions was used



Supplementary Table 3. Relation of the relative abundance of human gut microbial genera and VFA or BMI

| Genus                              | VFA      |         |          |          | BMI      |          |          |          |
|------------------------------------|----------|---------|----------|----------|----------|----------|----------|----------|
|                                    | Men      |         | Women    |          | Men      |          | Women    |          |
|                                    | Estimate | P value | Estimate | P value  | Estimate | P value  | Estimate | P value  |
| Acidaminococcus                    | 0.090    | 0.075   | 0.041    | 0.312    | 0.101    | 0.045*   | 0.060    | 0.139    |
| Akkermansia                        | -0.084   | 0.097   | -0.054   | 0.186    | -0.057   | 0.265    | -0.061   | 0.133    |
| Alistipes                          | -0.009   | 0.861   | -0.039   | 0.335    | -0.012   | 0.814    | -0.004   | 0.927    |
| Alloprevotella                     | 0.037    | 0.466   | 0.010    | 0.797    | 0.008    | 0.868    | -0.013   | 0.750    |
| Anaerostipes                       | -0.029   | 0.564   | -0.098   | 0.015*   | -0.016   | 0.750    | -0.111   | 0.006**  |
| Bacteroides                        | -0.046   | 0.365   | -0.062   | 0.128    | -0.070   | 0.165    | -0.090   | 0.027*   |
| Barnesiella                        | -0.001   | 0.989   | -0.054   | 0.185    | -0.003   | 0.951    | -0.010   | 0.799    |
| Bifidobacterium                    | -0.135   | 0.008** | -0.104   | 0.010**  | -0.104   | 0.040*   | -0.047   | 0.245    |
| Bilophila                          | 0.018    | 0.715   | 0.015    | 0.707    | 0.034    | 0.500    | -0.015   | 0.714    |
| Blautia                            | -0.154   | 0.002** | -0.121   | 0.003**  | -0.087   | 0.086    | -0.117   | 0.004**  |
| Butyricoccus                       | -0.035   | 0.493   | 0.010    | 0.814    | -0.011   | 0.827    | -0.027   | 0.513    |
| Catenibacterium                    | 0.087    | 0.086   | 0.016    | 0.687    | 0.084    | 0.095    | 0.024    | 0.549    |
| Clostridium.IV                     | 0.029    | 0.573   | 0.047    | 0.245    | 0.063    | 0.216    | 0.077    | 0.057    |
| Clostridium.sensu.stricto          | 0.027    | 0.599   | 0.144    | <0.001** | 0.052    | 0.306    | 0.173    | <0.001** |
| Clostridium.XIVa                   | 0.028    | 0.587   | 0.018    | 0.663    | 0.009    | 0.866    | -0.017   | 0.668    |
| Clostridium.XIVb                   | 0.090    | 0.076   | -0.082   | 0.043*   | 0.093    | 0.066    | -0.085   | 0.035*   |
| Clostridium.XVIII                  | 0.019    | 0.713   | -0.056   | 0.168    | 0.013    | 0.793    | -0.083   | 0.041*   |
| Collinsella                        | 0.057    | 0.259   | 0.015    | 0.718    | 0.015    | 0.761    | 0.021    | 0.612    |
| Coprococcus                        | -0.025   | 0.618   | 0.085    | 0.035*   | 0.037    | 0.464    | 0.062    | 0.124    |
| Dialister                          | 0.093    | 0.067   | 0.044    | 0.283    | 0.070    | 0.167    | 0.072    | 0.074    |
| Dorea                              | 0.005    | 0.919   | 0.087    | 0.032*   | -0.013   | 0.793    | 0.090    | 0.026*   |
| Eggerthella                        | -0.061   | 0.228   | -0.129   | 0.001**  | -0.097   | 0.054    | -0.091   | 0.024*   |
| Enterococcus                       | -0.069   | 0.170   | 0.042    | 0.297    | -0.106   | 0.036*   | 0.068    | 0.094    |
| Erysipelotrichaceae incertae sedis | -0.055   | 0.274   | -0.106   | 0.009**  | -0.126   | 0.012*   | -0.104   | 0.010*   |
| Escherichia/Shigella               | -0.058   | 0.252   | 0.038    | 0.352    | -0.103   | 0.042*   | 0.040    | 0.324    |
| Faecalibacterium                   | -0.053   | 0.296   | 0.021    | 0.603    | 0.053    | 0.298    | -0.004   | 0.920    |
| Flavonifractor                     | -0.028   | 0.577   | -0.145   | <0.001** | -0.080   | 0.113    | -0.115   | 0.004**  |
| Fusicatenibacter                   | -0.015   | 0.767   | 0.047    | 0.243    | 0.019    | 0.706    | 0.058    | 0.152    |
| Fusobacterium                      | 0.011    | 0.833   | -0.035   | 0.394    | -0.045   | 0.378    | -0.062   | 0.126    |
| Gemmiger                           | -0.073   | 0.148   | 0.059    | 0.148    | -0.009   | 0.860    | 0.057    | 0.158    |
| Holdemanella                       | 0.047    | 0.358   | 0.078    | 0.054    | 0.110    | 0.030*   | 0.054    | 0.185    |
| Intestinibacter                    | -0.022   | 0.662   | 0.043    | 0.043*   | -0.031   | 0.541    | 0.096    | 0.018*   |
| Klebsiella                         | 0.012    | 0.807   | 0.023    | 0.575    | -0.012   | 0.821    | 0.063    | 0.123    |
| Lachnospiracea incertae sedis      | -0.033   | 0.510   | 0.043    | 0.291    | 0.005    | 0.921    | 0.034    | 0.405    |
| Lactobacillus                      | 0.010    | 0.849   | 0.086    | 0.034*   | 0.029    | 0.354    | 0.098    | 0.015*   |
| Megamonas                          | 0.083    | 0.100   | 0.049    | 0.222    | 0.034    | 0.503    | 0.030    | 0.467    |
| Megasphaera                        | 0.036    | 0.480   | 0.114    | 0.005**  | 0.031    | 0.545    | 0.085    | 0.036*   |
| Mitsuokella                        | 0.036    | 0.473   | 0.068    | 0.095    | 0.059    | 0.242    | 0.046    | 0.262    |
| Odoribacter                        | -0.047   | 0.358   | -0.037   | 0.365    | -0.024   | 0.632    | -0.026   | 0.518    |
| Oscillibacter                      | -0.012   | 0.813   | 0.001    | 0.988    | 0.011    | 0.834    | 0.025    | 0.538    |
| Parabacteroides                    | -0.067   | 0.184   | -0.046   | 0.258    | -0.072   | 0.158    | -0.052   | 0.199    |
| Paraprevotella                     | 0.007    | 0.888   | 0.046    | 0.259    | 0.013    | 0.796    | 0.046    | 0.258    |
| Parasutterella                     | 0.050    | 0.323   | 0.099    | 0.015**  | 0.060    | 0.234    | 0.122    | 0.003**  |
| Phascolarctobacterium              | 0.065    | 0.199   | -0.026   | 0.521    | 0.026    | 0.615    | -0.017   | 0.684    |
| Prevotella                         | 0.007    | 0.888   | 0.010    | 0.797    | 0.168    | <0.001** | 0.005    | 0.904    |
| Romboutsia                         | 0.014    | 0.781   | 0.109    | 0.007**  | 0.066    | 0.195    | 0.154    | <0.001** |
| Roseburia                          | -0.024   | 0.638   | 0.104    | 0.010**  | 0.011    | 0.828    | 0.112    | 0.006**  |
| Ruminococcus                       | 0.014    | 0.778   | 0.091    | 0.025*   | 0.053    | 0.297    | 0.097    | 0.017*   |
| Senegalimassilia                   | -0.016   | 0.755   | 0.050    | 0.217    | 0.058    | 0.257    | 0.047    | 0.245    |
| Streptococcus                      | -0.002   | 0.960   | -0.119   | 0.019**  | -0.144   | 0.004**  | 0.007    | 0.871    |
| Sutterella                         | 0.007    | 0.897   | -0.119   | 0.003**  | 0.077    | 0.130    | -0.106   | 0.009**  |
| Turicibacter                       | 0.011    | 0.834   | 0.033    | 0.418    | 0.030    | 0.549    | 0.098    | 0.016*   |
| Veillonella                        | -0.122   | 0.016*  | -0.003   | 0.945    | -0.147   | 0.004**  | 0.001    | 0.973    |

Spearman's correlation coefficient was used.

Supplementary Table 4. Multiple regression analysis of association among Blautia and related factors

| MEN |           |                       | WOMEN         |           |                       |
|-----|-----------|-----------------------|---------------|-----------|-----------------------|
|     | Estimate  | P value <sup>*1</sup> |               | Estimate  | P value <sup>*1</sup> |
| VFA | -1.09E-04 | 0.032*                | VFA           | -1.39E-04 | 0.015*                |
| Age | -2.07E-02 | 0.175                 | Age           | 8.55E-05  | 0.528                 |
|     |           |                       | Smoking habit | 6.08E-04  | 0.070                 |
|     |           |                       | Sleeptime     | 3.20E-03  | 0.074                 |
|     |           |                       | Walk speed    | -4.28E-03 | 0.061                 |

\*P<0.05

\*1 Step-wise method based on AIC criterion was used

Supplementary Table 5. Characteristics of the subjects in the confirmation group stratified by sex and VFA

| Characteristics                                    | Men    |   |        | Women  |   |        | P value  |
|----------------------------------------------------|--------|---|--------|--------|---|--------|----------|
|                                                    |        | ± |        |        | ± |        |          |
| Visceral fat area (cm <sup>2</sup> )*1             | 95.4   |   | 47.6   | 63.6   |   | 34.4   | <0.001** |
| Number                                             | 126    |   |        | 210    |   |        |          |
| Age (yr) <sup>*1</sup>                             | 50.4   | ± | 17.5   | 51.4   | ± | 17.6   | 0.623    |
| Height (cm) <sup>*1</sup>                          | 168.7  | ± | 6.8    | 156.0  | ± | 6.7    | <0.001** |
| Body weight (kg) <sup>*1</sup>                     | 66.6   | ± | 10.5   | 54.8   | ± | 9.9    | <0.001** |
| Body mass index (kg/m <sup>2</sup> ) <sup>*1</sup> | 23.3   | ± | 3.0    | 22.5   | ± | 3.7    | 0.008**  |
| Waist circumference (cm) <sup>*1</sup>             | 81.9   | ± | 8.9    | 74.6   | ± | 9.8    | <0.001** |
| Serum Glucose (mg/dL) <sup>*1</sup>                | 5.15   | ± | 0.91   | 5.13   | ± | 1.73   | 0.030*   |
| HbA1c (%) <sup>*1</sup>                            | 5.8    | ± | 0.5    | 5.9    | ± | 0.9    | 0.580    |
| SBP (mmHg) <sup>*1</sup>                           | 127.0  | ± | 16.0   | 122.7  | ± | 20.5   | 0.012    |
| DBP (mmHg) <sup>*1</sup>                           | 78.2   | ± | 11.8   | 72.7   | ± | 11.8   | <0.001** |
| Triglyceride (mg/dL) <sup>*1</sup>                 | 1.3    | ± | 0.8    | 1.0    | ± | 0.8    | <0.001** |
| Total cholesterol (mg/dL) <sup>*1</sup>            | 5.0    | ± | 0.9    | 5.3    | ± | 1.1    | 0.054    |
| HDL cholesterol (mg/dL) <sup>*1</sup>              | 1.5    | ± | 0.4    | 1.7    | ± | 0.4    | <0.001** |
| LDL cholesterol (mg/dL) <sup>*1</sup>              | 2.9    | ± | 0.7    | 3.0    | ± | 0.9    | 0.478    |
| Smoking habits (stick/d) <sup>*1</sup>             | 10.9   | ± | 11.2   | 2.2    | ± | 4.9    | <0.001** |
| Sleep time (h/d) <sup>*1</sup>                     | 7.1    | ± | 1.3    | 6.9    | ± | 1.2    | 0.138    |
| Walk speed (sec/10m) <sup>*1</sup>                 | 3.5    | ± | 1.0    | 3.9    | ± | 1.0    | <0.001** |
| Habitual medicine use (% of Yes) <sup>*2</sup>     | 28.5%  |   |        | 29.0%  |   |        | 0.805    |
| Hypertension <sup>*2</sup>                         | 25.4%  |   |        | 24.3%  |   |        | 0.922    |
| Hyperlipidaemia <sup>*2</sup>                      | 11.1%  |   |        | 8.5%   |   |        | 0.565    |
| Diabetes <sup>*2</sup>                             | 7.1%   |   |        | 5.2%   |   |        | 0.634    |
| Rheumatism <sup>*2</sup>                           | 0.0%   |   |        | 0.5%   |   |        | 1.000    |
| Total energy intake (kcal/d) <sup>*1</sup>         | 9004.1 | ± | 2427.5 | 7027.9 | ± | 2375.1 | <0.001** |
| Carbohydrate intake <sup>*1</sup>                  | 0.59   | ± | 0.08   | 0.56   | ± | 0.07   | 0.643    |
| Fat intake <sup>*1</sup>                           | 0.26   | ± | 0.06   | 0.28   | ± | 0.06   | <0.001** |
| Protein intake <sup>*1</sup>                       | 0.15   | ± | 0.03   | 0.16   | ± | 0.03   | <0.001** |
| Alcohol consumption (g/d) <sup>*1</sup>            | 23.6   | ± | 27.7   | 4.5    | ± | 10.2   | <0.001** |
| Total dietary fibre intake (g/d) <sup>*1</sup>     | 10.9   | ± | 4.8    | 10.4   | ± | 4.8    | 0.261    |
| Diversity of intestinal microbiota <sup>*1</sup>   | 9.7    | ± | 3.3    | 10.1   | ± | 2.2    | <0.001** |

P<0.05 and <0.01 are indicated by \* and \*\*, respectively.

\*1Wilcoxon rank-sum test was used

\*2 test for equality of proportions was used
